# Supplementary material for: Predicting Long-Term Mortality in TAVI Patients Using Machine Learning Techniques
Source: MDPI journal article supplement (doi:10.3390/jcdd8040044), 2021-04-16
Supplement: s1 [file s1]

**Table S1** – Summarized baseline clinical and echocardiographic characteristics grouped by 5-years mortality after TAVI.

|                                         | <b>Survivor<br/>(n = 259)</b> | <b>Non-Survivor<br/>(n = 212)</b> | <i>p</i> -value |
|-----------------------------------------|-------------------------------|-----------------------------------|-----------------|
| Age (year)                              | 80 ± 6                        | 82 ± 6                            | 0.025           |
| Men                                     | 95 (36.7%)                    | 76 (35.8%)                        | 0.852           |
| Body surface area (m <sup>2</sup> )     | 1.71 ± 0.20                   | 1.69 ± 0.18                       | 0.234           |
| Body mass index (Kg/m <sup>2</sup> )    | 26 ± 5                        | 25 ± 5                            | 0.276           |
| Sinus rhythm                            | 225 (86.9%)                   | 152 (71.7%)                       | <0.001          |
| Diabetes mellitus II                    | 61 (23.6%)                    | 61 (28.8%)                        | 0.198           |
| Diabetes on insulin therapy             | 15 (5.8%)                     | 16 (7.5%)                         | 0.445           |
| Hypertension                            | 230 (88.8%)                   | 181 (85.4%)                       | 0.267           |
| Dyslipidemia                            | 161 (62.2%)                   | 115 (54.2%)                       | 0.083           |
| Angina                                  | 90 (34.7%)                    | 57 (26.9%)                        | 0.057           |
| Dyspnea                                 | 234 (90.3%)                   | 198 (93.4%)                       | 0.232           |
| Syncope                                 | 54 (20.1%)                    | 33 (15.6%)                        | 0.142           |
| COPD                                    | 65 (25.1%)                    | 66 (31.1%)                        | 0.146           |
| Chronic lung disease                    | 66 (25.5%)                    | 51 (24.1%)                        | 0.722           |
| NYHA functional class III or IV         | 191 (73.7%)                   | 178 (84.0%)                       | 0.007           |
| EuroSCORE II                            | 14 (8-20)                     | 18 (12-25)                        | <0.001          |
| Previous stroke                         | 29 (11.2%)                    | 31 (14.6%)                        | 0.267           |
| Porcelain aorta                         | 21 (8.1%)                     | 11 (5.2%)                         | 0.210           |
| Peripheral vascular disease             | 106 (40.9%)                   | 95 (44.8%)                        | 0.396           |
| Coronary artery disease                 | 140 (54.1%)                   | 130 (61.3%)                       | 0.113           |
| Number vessel disease                   | 1 (0–2)                       | 1 (0–2)                           | 0.279           |
| Previous CABG                           | 37 (14.3%)                    | 34 (16.0%)                        | 0.597           |
| Previous PCI                            | 82 (31.7%)                    | 62 (29.2%)                        | 0.571           |
| Prior myocardial infarction             | 47 (18.1%)                    | 45 (21.2%)                        | 0.402           |
| Recent myocardial infarction (<90 days) | 6 (2.3%)                      | 6 (2.8%)                          | 0.725           |
| Atrial fibrillation                     | 30 (11.6%)                    | 56 (26.4%)                        | <0.001          |
| AV block pacemaker                      | 20 (7.7%)                     | 15 (7.1%)                         | 0.790           |
| Paced at baseline                       | 17 (6.6%)                     | 33 (15.6%)                        | 0.002           |
| Poor mobility                           | 63 (24.3%)                    | 63 (29.7%)                        | 0.188           |
| Neurological dysfunction                | 30 (11.6%)                    | 17 (8.0%)                         | 0.199           |
| Frailty                                 | 21 (8.1%)                     | 52 (24.5%)                        | <0.001          |
| Cognitive dysfunction/dementia          | 25 (9.7%)                     | 26 (12.3%)                        | 0.364           |
| Critical preoperative state             | 7 (2.7%)                      | 10 (4.7%)                         | 0.244           |
| Previous cardiac surgery                | 44 (17.0%)                    | 46 (21.7%)                        | 0.196           |
| Ascites                                 | 1 (0.4%)                      | 3 (1.4%)                          | 0.226           |
| Cirrhosis                               | 6 (2.3%)                      | 10 (4.7%)                         | 0.153           |
| Dialysis                                | 1 (0.4%)                      | 3 (1.4%)                          | 0.226           |
| Hostile chest                           | 54 (20.8%)                    | 55 (25.9%)                        | 0.192           |
| Previous neoplasm                       | 59 (22.8%)                    | 48 (22.6%)                        | 0.972           |
| Active endocarditis                     | 0 (0%)                        | 0 (0%)                            | /               |
| Procedural urgency                      | 12 (4.6%)                     | 9 (4.2%)                          | 0.839           |
| Creatinine (mg/dl)                      | 0.92 (0.77–1.20)              | 1.16 (0.91–1.48)                  | <0.001          |
| Hemoglobin (g/dl)                       | 12.4 ± 1.7                    | 11.9 ± 1.6                        | <0.001          |
| C reactive protein ≥6 (mg/dl)           | 63 (24.3%)                    | 76 (35.8%)                        | 0.006           |
| Total bilirubin (μmol/l)                | 0.73 (0.59–0.95)              | 0.78 (0.59–1.06)                  | 0.225           |
| Aspartate transaminase (U/l)            | 20 (17–27)                    | 21 (17–28)                        | 0.573           |
| Alanine aminotransferase (U/l)          | 17 (12–23)                    | 16 (12–22)                        | 0.448           |
| International normalized ratio          | 1.05 ± 0.19                   | 1.17 ± 0.42                       | <0.001          |
| B-blocker                               | 122 (47.1%)                   | 87 (41.0%)                        | 0.187           |

|                                                                                   |             |             |        |
|-----------------------------------------------------------------------------------|-------------|-------------|--------|
| Diuretics                                                                         | 177 (68.3%) | 175 (82.5%) | <0.001 |
| Spironolactone                                                                    | 42 (16.2%)  | 63 (29.7%)  | <0.001 |
| Calcium channel blocker                                                           | 60 (23.2%)  | 50 (23.6%)  | 0.915  |
| Statins                                                                           | 113 (43.6%) | 78 (36.8%)  | 0.133  |
| Anticoagulant                                                                     | 61 (23.6%)  | 38 (17.9%)  | 0.136  |
| Angiotensin converting enzyme inhibitor<br>and/or angiotensin II receptor blocker | 156 (60.2%) | 123 (58.0%) | 0.627  |
| Systolic blood pressure (mmHg)                                                    | 128 ± 16    | 126 ± 17    | 0.085  |
| Diastolic blood pressure (mmHg)                                                   | 72 ± 9      | 70 ± 10     | 0.141  |
| LVEDD (mm)                                                                        | 48 ± 8      | 49 ± 8      | 0.220  |
| IVST (mm)                                                                         | 13 ± 2      | 14 ± 2      | 0.496  |
| Posterior wall thickness (mm)                                                     | 12 ± 2      | 12 ± 2      | 0.841  |
| LV mass index (g/m <sup>2</sup> )                                                 | 143 ± 39    | 151 ± 40    | 0.036  |
| LVEDV index (ml/m <sup>2</sup> )                                                  | 52 (42–66)  | 55 (43–70)  | 0.118  |
| LVESV index (ml/m <sup>2</sup> )                                                  | 20 (15–31)  | 23 (16–37)  | 0.014  |
| LVEF (%)                                                                          | 60 (52–66)  | 58 (43–64)  | 0.003  |
| Left atrium area (cm <sup>2</sup> )                                               | 26 ± 6      | 28 ± 7      | <0.001 |
| Left atrial volume index (ml/m <sup>2</sup> )                                     | 53 ± 25     | 61 ± 22     | 0.001  |
| LVOT (mm)                                                                         | 20 ± 2      | 20 ± 2      | 0.853  |
| Aortic annulus (mm)                                                               | 21 ± 2      | 21 ± 2      | 0.646  |
| Ascending aorta (mm)                                                              | 34 ± 4      | 33 ± 4      | 0.369  |
| Grade aortic valve calcium                                                        | 3.0 ± 0.4   | 3.0 ± 0.5   | 0.662  |
| Mean aortic pressure gradient (mmHg)                                              | 53 ± 14     | 48 ± 15     | 0.001  |
| Peak aortic pressure gradient (mmHg)                                              | 85 ± 21     | 79 ± 23     | 0.002  |
| LVOT_VTI (cm)                                                                     | 22 ± 4      | 21 ± 5      | 0.003  |
| LV stroke volume (ml/m <sup>2</sup> )                                             | 42 ± 8      | 40 ± 9      | 0.020  |
| Aortic valve area (cm <sup>2</sup> )                                              | 0.64 ± 0.14 | 0.66 ± 0.14 | 0.078  |
| Aortic regurgitation ≥2                                                           | 69 (26.6%)  | 51 (24.1%)  | 0.522  |
| Mitral regurgitation ≥2                                                           | 65 (25.1%)  | 79 (37.3%)  | 0.004  |
| Tricuspid regurgitation ≥2                                                        | 37 (14.3%)  | 52 (24.5%)  | 0.005  |
| Mitral regurgitation etiology                                                     |             |             | <0.001 |
| Function                                                                          | 182 (70.3%) | 113 (53.3%) |        |
| Organic                                                                           | 77 (29.7%)  | 99 (46.7%)  |        |
| Previous mitral valve repair                                                      | 4 (1.5%)    | 0 (0%)      | 0.131  |
| Previous mitral valve replacement                                                 | 2 (0.8%)    | 10 (4.7%)   | 0.008  |
| Systolic pulmonary artery pressure (mmHg)                                         | 40 ± 11     | 44 ± 12     | <0.001 |
| Prosthesis to indexed annulus size ratio                                          | 2.38 ± 0.46 | 2.37 ± 0.51 | 0.815  |

Values are mean ± SD, median (twenty-fifth–seventy-fifth percentile) or n(%).

AV, atrioventricular; CABG, coronary artery bypass graft; COPD, chronic obstructive pulmonary disease; EDD, end diastolic diameter; EDV, end diastolic volume; EF, ejection fraction; ESV, end systolic volume; IVST, interventricular septal thickness; LV, left ventricular; LVOT, left ventricular outflow tract; NYHA, New York Heart Association; PCI, percutaneous coronary intervention; VTI, velocity time integral. \*:  $p < 0.05$ , survivors vs non-survivors (unpaired Student's t test, Mann-Whitney U test, or  $\chi^2$  test).

**Table S2** – Remove quasi-constant/constant features (features that have approximately 99% of the values are similar) and correlated features (threshold 0.7).

| Constant features            | Correlated features           |
|------------------------------|-------------------------------|
| Previous mitral valve repair | Aspartate transaminase        |
| Active endocarditis          | Sinus rhythm                  |
| Dialysis                     | Left atrial volume index      |
| Ascites                      | LVESV index                   |
|                              | CABG                          |
|                              | Peak aortic pressure gradient |
|                              | LVOT_VTI                      |
|                              | Number vessel disease         |
|                              | LVEDV index                   |

CABG, coronary artery bypass graft; EDV, end diastolic volume; ESV, end systolic volume; LV, left ventricular; LVOT, left ventricular outflow tract; VTI, velocity time integral.

**Table S3** – Hyperparameters for random forest, gradient boosting and multilayer perceptron algorithms.

Hyperparameter tuning of the models was conducted by grid search using five-fold cross-validation. The scoring function used was F1-score. The hyper-parameter space searched over are presented below.

| <b>Random Forest</b>             |                                                |
|----------------------------------|------------------------------------------------|
| n_estimators                     | [50,60,80,100,200,400,500]                     |
| max_depth                        | [3–7]                                          |
| min_sample_split                 | [3–8]                                          |
| min_samples_leaf                 | [1–4]                                          |
| <b>Gradient boosting machine</b> |                                                |
| learning_rate                    | [0.1,0.01]                                     |
| n_estimators                     | [50,60,80,100,200,400,500]                     |
| max_depth                        | [3–7]                                          |
| min_child_weight                 | [1–4]                                          |
| gamma                            | [0, 0.5,1,1.5,2,5]                             |
| colsample_bytree                 | [0.6,0.8,1]                                    |
| <b>Multilayer perceptron</b>     |                                                |
| batch size                       | [1,2,4,8]                                      |
| hidden layer                     | [1–3]                                          |
| learning rate                    | [0.1,0.01]                                     |
| dropout rate                     | [0.0,0.2,0.3,0.5]                              |
| dense layer units                | [5,10,15]                                      |
| weight initialization            | ['uniform', 'zero', 'he_normal', 'he_uniform'] |

Multilayer perceptron was implemented in keras. Optimizer='Adam', dense layer activation function='Relu', output layer activation function="sigmoid", loss function="binary\_crossentropy", epochs=100 with early stopping if the validation loss did not continue to decrease in 10 epochs.

```

import tensorflow as tf
from tensorflow import keras
from tensorflow.keras import layers
from tensorflow.keras import backend as K
from tensorflow.keras.models import Sequential
from tensorflow.keras.layers import Dense, Activation
from tensorflow.keras.layers import Dropout
from tensorflow.keras import regularizers
from tensorflow.keras import initializers
from tensorflow.keras.callbacks import EarlyStopping

def create_nn(input_shape,
              hidden_layers=1,
              dropout_rate = 0.0,
              learn_rate = 0.01,
              neurons = 5,
              activation = 'relu',
              optimizer = 'adam',
              init_mode = 'uniform'):
    model = Sequential()

    model.add(Dense(15, activation=activation,
                    input_shape=input_shape,
                    kernel_initializer=init_mode))
    model.add(Dropout(dropout_rate))

    for i in range(hidden_layers):
        model.add(Dense(neurons, activation=activation,
                        kernel_initializer=init_mode))
        model.add(Dropout(dropout_rate))

    model.add(Dense(1, activation='sigmoid', kernel_initializer=init_mode))

    Optimizer = optimizer(lr=learn_rate)
    model.compile(
        loss='binary_crossentropy',
        optimizer=Optimizer,
        metrics=['accuracy']
        #metrics=['accuracy', f1_m, precision_m, recall_m]
    ) #mean_absolute_error #binary_crossentropy

    return model

from tensorflow.keras import backend as K

def recall_m(y_true, y_pred):
    true_positives = K.sum(K.round(K.clip(y_true * y_pred, 0, 1)))
    possible_positives = K.sum(K.round(K.clip(y_true, 0, 1)))

```

```

recall = true_positives / (possible_positives + K.epsilon())
return recall

def precision_m(y_true, y_pred):
    true_positives = K.sum(K.round(K.clip(y_true * y_pred, 0, 1)))
    predicted_positives = K.sum(K.round(K.clip(y_pred, 0, 1)))
    precision = true_positives / (predicted_positives + K.epsilon())
    return precision

def f1_m(y_true, y_pred):
    precision = precision_m(y_true, y_pred)
    recall = recall_m(y_true, y_pred)
    return 2*((precision*recall)/(precision+recall+K.epsilon()))

param_grid = {'batch_size': [1,2,4,8],
               #'optimizer' : ['Adam', 'Nadam'],
               'dropout_rate' : [0.0, 0.2, 0.3, 0.5],
               'learn_rate' : [0.1, 0.01],
               'neurons' : [5,10,15],
               'hidden_layers ' : [5,10,15],
               'init_mode' : ['uniform', 'zero', 'he_normal', 'he_uniform'],
               #'activation' : ['relu', 'elu']}

model = KerasClassifier(build_fn = create_nn, input_shape=(shape,), epochs=100,
verbose=0)

# Fit the model
gs = GridSearchCV(
    estimator=model,
    param_grid=param_grid,
    cv=cv,
    n_jobs=-1,
    verbose=2
)
hist = gs.fit(Xtrain, Ytrain)
print("Best: %f using %s" % (hist.best_score_, hist.best_params_))

fitted_model = hist.best_estimator_

scores = fitted_model.evaluate(x_test, y_test, verbose=0)

print('%s: %.2f' % (fitted_model.metrics_names[0], scores[0]))
cvloss.append(scores[0])
yhat_classes = fitted_model.predict_classes(x_test, verbose=0)
yhat_probs = fitted_model.predict(x_test, verbose=0)
yhat_classes = yhat_classes[:, 0]
yhat_probs = yhat_probs[:, 0]

```
